# Supplementary material for: Testing an Arduino-Based Approach for Full-Duplex Voice Communication and Body-Parameter Sensing Electronics for Use with Smart Clothing
Source: Hindawi journal article supplement (doi:10.1155/2019/8598912), 2019-05-08
Supplement: f1 [file 8598912.f1.zip]

Archive with 6 entries (6 files):
- testing_30m_range_video_rotated.mp4
- Rx1/Rx1.ino
- Rx2/Rx2.ino
- Tx1/Tx1.ino
- Tx2/Tx2.ino
- testing_5m_range_video.mp4
