# Supplementary material for: Testing an Arduino-Based Approach for Full-Duplex Voice Communication and Body-Parameter Sensing Electronics for Use with Smart Clothing
Source: Hindawi journal article supplement (doi:10.1155/2019/8598912), 2019-05-08
Supplement: f1 [file 8598912.f1.zip › Rx2/Rx2.ino]

#include <RF24.h>   
#include <SPI.h>
#include <RF24V.h>
RF24 radio(7,8);    
RF24V Sound(radio,0);

void setup() {
radio.begin();
radio.setChannel(1);
radio.setPALevel(RF24_PA_MAX);
radio.setDataRate(RF24_2MBPS);

Sound.begin();
Sound.reader();} 
void loop() {}
