# Supplementary material for: Testing an Arduino-Based Approach for Full-Duplex Voice Communication and Body-Parameter Sensing Electronics for Use with Smart Clothing
Source: Hindawi journal article supplement (doi:10.1155/2019/8598912), 2019-05-08
Supplement: f1 [file 8598912.f1.zip › Tx2/Tx2.ino]

#include <RF24.h>   
#include <SPI.h>
#include <RF24V.h>
RF24 radio(7,8);
RF24V Sound(radio,0);

void setup() { 
radio.begin(); 
radio.setChannel(75);
radio.setPALevel(RF24_PA_MAX);
radio.setDataRate(RF24_2MBPS); 

Sound.begin();
Sound.transfer();} // Postavljanje modula u Tx ražim rada 
void loop() {}
